# Supplementary material for: Zea mays Taxilin Protein Negatively Regulates Opaque-2 Transcriptional Activity by Causing a Change in Its Sub-Cellular Distribution
Source: PubMed Central journal article supplement (PMC3427180; doi:10.1371/journal.pone.0043822), 2012-08-24
Supplement: pone.0043822.s001.pdf [file pone.0043822.s001.pdf]

|                                  | 1     | 50                                                                                                                                                                                                                         |
|----------------------------------|-------|----------------------------------------------------------------------------------------------------------------------------------------------------------------------------------------------------------------------------|
| ACN28388 zea mays                | (1)   | MEGSPVARLPEANSLPDGFVPDSESSDTDAAPPSAPIVDDAIDS <del>SPDA</del>                                                                                                                                                               |
| XP_002468045 Sorghum bicolor     | (1)   | MEGSPVTRLPEANSLPDGFVPDVESSTDAAPPSAPIAADALDS <del>IPAA</del>                                                                                                                                                                |
| XP_002276892 Vitis vinifera      | (1)   | MEN <del>TA</del> ANQLPEVDSLDPDGFVSSAEPVAPPPTLDKES---DYK <del>SNFS</del>                                                                                                                                                   |
| XP_002316353 Populus trichocarpa | (1)   | MENRVANQLPEVDSLDPDGFVSSMEPVAPQPTTSEQEKPVS <del>CKEDSIGK</del>                                                                                                                                                              |
| XP_002529722 Ricinus communis    | (1)   | MNV <del>DA</del> ANQLPEVDSLDPDGFV <del>GS</del> IESLAPP <del>TPPF</del> EQEKPLSVR <del>NKDSISE</del>                                                                                                                      |
| Consensus                        | (1)   | MENS ANQLPEVDSLDPDGFVD S ESVAP TPPSE E DS A                                                                                                                                                                                |
|                                  | 51    | 100                                                                                                                                                                                                                        |
| ACN28388 zea mays                | (51)  | TNPGGEETLS <del>DP</del> SLPASTAEDASSAAA <del>EALD</del> -----                                                                                                                                                             |
| XP_002468045 Sorghum bicolor     | (51)  | TNPGGEETLS <del>DL</del> SLPASAEDASSAAA <del>EALG</del> -----                                                                                                                                                              |
| XP_002276892 Vitis vinifera      | (47)  | TTEP <del>SND</del> LENESLELLD <del>SSVDRV</del> EKTQK <del>R</del>                                                                                                                                                        |
| XP_002316353 Populus trichocarpa | (51)  | VDHV <del>SEAL</del> QELANESQTSQNGTEKPEKMRNFPVPLSDIDGCDASVHLV                                                                                                                                                              |
| XP_002529722 Ricinus communis    | (51)  | IVHP <del>TGGL</del> PEFANESQTSQSENEK <del>VNMR</del> -----TLFDASVL                                                                                                                                                        |
| Consensus                        | (51)  | T SE L D SL S TS SSEK A R                                                                                                                                                                                                  |
|                                  | 101   | 150                                                                                                                                                                                                                        |
| ACN28388 zea mays                | (83)  | -----TLC <del>L</del> DVVADPERALGHEGFTTAARGEGSLKEN                                                                                                                                                                         |
| XP_002468045 Sorghum bicolor     | (83)  | -----TLS <del>AAA</del> AEPERALGHEGFTGAARGEEILKEN                                                                                                                                                                          |
| XP_002276892 Vitis vinifera      | (77)  | -----TFP <del>PL</del> SEKDGFDSSGES <del>PKVTNK</del> QCSEPEGA                                                                                                                                                             |
| XP_002316353 Populus trichocarpa | (100) | VEPDQGAWQEEGTLTKPVLLD <del>LVPE</del> ASVGV <del>RCSE</del> EVIEVQ <del>GSSQ</del> SSDRS                                                                                                                                   |
| XP_002529722 Ricinus communis    | (89)  | IVDHAHVEQVEGTATILD <del>AN</del> VSNTSIEV <del>GCSE</del> LNQVSGN <del>CQ</del> SSDRS                                                                                                                                      |
| Consensus                        | (101) | T L A E A E P ARG S ES                                                                                                                                                                                                     |
|                                  | 151   | 200                                                                                                                                                                                                                        |
| ACN28388 zea mays                | (115) | R-----ASEQV <del>GAPS</del> DQK <del>VV</del> KGS---GEP <del>KR</del> K <del>R</del> VI <del>KH</del> SKLEK <del>DK</del> EL                                                                                               |
| XP_002468045 Sorghum bicolor     | (115) | C-----ASEQV <del>GAPT</del> AQK <del>VV</del> KGS---GEP <del>KR</del> K <del>V</del> G <del>R</del> S <del>KL</del> ERD <del>R</del> EL                                                                                    |
| XP_002276892 Vitis vinifera      | (109) | TEGSDAPT <del>HL</del> KDVSSSESIEHL <del>KN</del> RKLETSEV <del>KR</del> K <del>S</del> AKRT <del>FK</del> SEKEF                                                                                                           |
| XP_002316353 Populus trichocarpa | (149) | TQGLDSQATGVKEISSSESTELQ <del>KGR</del> KEATE <del>KR</del> K <del>N</del> AKRT <del>FK</del> SEKEF                                                                                                                         |
| XP_002529722 Ricinus communis    | (139) | VQGSSTYAT <del>DV</del> KEMSSSESLSQ <del>SQ</del> GRKLETP <del>EAK</del> R <del>R</del> N <del>P</del> K <del>R</del> S <del>FK</del> SEKEF                                                                                |
| Consensus                        | (151) | GG TAVKEVSSSES VVKGR E E KRK AKRS FKSEKEF                                                                                                                                                                                  |
|                                  | 201   | 250                                                                                                                                                                                                                        |
| ACN28388 zea mays                | (152) | FQLAQQYHKVVAERDQAI <del>AV</del> KDRLES <del>L</del> CRE <del>FQ</del> RQNK <del>ML</del> KE <del>EC</del> RVSTEGQ                                                                                                         |
| XP_002468045 Sorghum bicolor     | (152) | FELAQQYHKVVAERDAAI <del>LV</del> KEKLES <del>L</del> CRE <del>FQ</del> RQNK <del>TL</del> KE <del>EC</del> RVSTEGQ                                                                                                         |
| XP_002276892 Vitis vinifera      | (158) | LEFSLK <del>YQ</del> QVIAERD <del>TAI</del> AVRDKLES <del>L</del> CRE <del>LQ</del> RQNK <del>ML</del> DE <del>EC</del> RVSAEGQ                                                                                            |
| XP_002316353 Populus trichocarpa | (197) | LEFTLKYQ <del>QV</del> LTERDAAI <del>VV</del> RDKLES <del>L</del> CRE <del>LQ</del> RQNK <del>ML</del> DE <del>EC</del> RVSTEGQ                                                                                            |
| XP_002529722 Ricinus communis    | (188) | LEFTLKYQ <del>QV</del> LAERDAAI <del>AV</del> RNKLES <del>L</del> CRE <del>LQ</del> RQNK <del>ML</del> ME <del>EC</del> RVSTEGQ                                                                                            |
| Consensus                        | (201) | LEFTLKYQVLAERDAAI <del>AV</del> RDKLES <del>L</del> CRE <del>LQ</del> RQNK <del>ML</del> ME <del>EC</del> RVSTEGQ                                                                                                          |
|                                  | 251   | 300                                                                                                                                                                                                                        |
| ACN28388 zea mays                | (202) | NMRTELSEK <del>FD</del> HAIKGVSAKLEE <del>Q</del> RVLS <del>IQ</del> LEEN <del>TL</del> RS <del>KL</del> KLADQ <del>YN</del>                                                                                               |
| XP_002468045 Sorghum bicolor     | (202) | NMRALSEK <del>FD</del> NAIKGVSAKLEE <del>Q</del> RVLS <del>IA</del> QLEEN <del>ML</del> RS <del>KL</del> KLADQ <del>YS</del>                                                                                               |
| XP_002276892 Vitis vinifera      | (208) | TLRLDLSTK <del>FQ</del> DAIKDVSSKLEE <del>Q</del> DE <del>CL</del> SQ <del>LE</del> NEMLR <del>NK</del> LKLADQ <del>YT</del>                                                                                               |
| XP_002316353 Populus trichocarpa | (247) | HLRLDLSTK <del>FQ</del> DAIKDVSNRLEE <del>Q</del> KEES <del>LT</del> Q <del>LE</del> NEMLR <del>KL</del> KEFADQ <del>YA</del>                                                                                              |
| XP_002529722 Ricinus communis    | (238) | TLRLDLSTK <del>FQ</del> DAIKDVSI <del>R</del> LEE <del>Q</del> KEEC <del>FS</del> Q <del>LE</del> NEMLR <del>T</del> KLKLADQ <del>YA</del>                                                                                 |
| Consensus                        | (251) | LRLDLSTK <del>FQ</del> DAIKDVSAKLEE <del>Q</del> KEE ISQLKENEMLR <del>SK</del> LKLADQ <del>YA</del>                                                                                                                        |
|                                  | 301   | 350                                                                                                                                                                                                                        |
| ACN28388 zea mays                | (252) | ITQ <del>Q</del> KYAHQLKE <del>K</del> MLELE <del>LAD</del> LRLQ <del>Q</del> HEKAAQ <del>EHT</del> Q <del>M</del> Q <del>L</del> YAEQ <del>V</del> SQ <del>L</del> MT                                                     |
| XP_002468045 Sorghum bicolor     | (252) | ITQ <del>Q</del> KYAHQLKE <del>K</del> TLELE <del>LAD</del> LRLQ <del>Q</del> HEKAAQ <del>EHT</del> Q <del>M</del> Q <del>L</del> YAEQ <del>V</del> QL <del>MT</del>                                                       |
| XP_002276892 Vitis vinifera      | (258) | ISEQ <del>Q</del> FAQ <del>L</del> K <del>Q</del> K <del>T</del> LELQ <del>LAD</del> LKNQ <del>Q</del> HEEK <del>L</del> IQE <del>Q</del> SQ <del>M</del> KLYAEQ <del>V</del> SQ <del>L</del> LT                           |
| XP_002316353 Populus trichocarpa | (297) | ISEQ <del>Q</del> NAQ <del>L</del> K <del>Q</del> K <del>T</del> LELQ <del>LAD</del> LK <del>IQ</del> HEEK <del>L</del> VQ <del>E</del> Q <del>S</del> Q <del>M</del> KLYAEQ <del>V</del> SQ <del>L</del> LA               |
| XP_002529722 Ricinus communis    | (288) | ISEQ <del>Q</del> HAQ <del>L</del> K <del>Q</del> K <del>S</del> LELQ <del>LAE</del> LK <del>IQ</del> HEEK <del>L</del> VHE <del>Q</del> SQ <del>M</del> KLYAEQ <del>V</del> SQ <del>L</del> LA                            |
| Consensus                        | (301) | ISEQ <del>Q</del> Y <del>A</del> Q <del>L</del> K <del>Q</del> K <del>T</del> LELQ <del>LAD</del> LKI <del>Q</del> QHEEK <del>L</del> VQ <del>E</del> Q <del>S</del> Q <del>M</del> KLYAEQ <del>V</del> SQ <del>L</del> LT |
|                                  | 351   | 400                                                                                                                                                                                                                        |
| ACN28388 zea mays                | (302) | TEKNLRLQLASDGERFQHFDALS <del>KS</del> NEVFETY <del>KQ</del> EMER <del>MS</del> VI <del>KN</del> LKKE                                                                                                                       |
| XP_002468045 Sorghum bicolor     | (302) | TEKNLRLQLASDGRFQHFDALS <del>KS</del> NEVFETY <del>KQ</del> EMER <del>MS</del> VI <del>KN</del> LKKE                                                                                                                        |
| XP_002276892 Vitis vinifera      | (308) | TEKSLRLQLTADGEK <del>FQ</del> Q <del>FQ</del> EAL <del>KS</del> NEVFET <del>FQ</del> E <del>TE</del> MA <del>KS</del> IKELKKE                                                                                              |
| XP_002316353 Populus trichocarpa | (347) | TEKTLRLQLTADG <del>K</del> FQ <del>Q</del> FQ <del>E</del> AL <del>KS</del> NEVFET <del>FQ</del> E <del>TD</del> MA <del>KS</del> IKELKKE                                                                                  |
| XP_002529722 Ricinus communis    | (338) | TEKNLR <del>M</del> KL <del>TAD</del> GEK <del>FQ</del> Q <del>FQ</del> DALL <del>KS</del> NEVFET <del>FQ</del> E <del>TE</del> K <del>R</del> TS <del>IK</del> KLKKE                                                      |
| Consensus                        | (351) | TEKNLRLQLTADGEK <del>FQ</del> Q <del>FQ</del> DALL <del>KS</del> NEVFET <del>FQ</del> E <del>IE</del> K <del>M</del> KS <del>IK</del> <b>LKKE</b>                                                                          |

### Zipper1

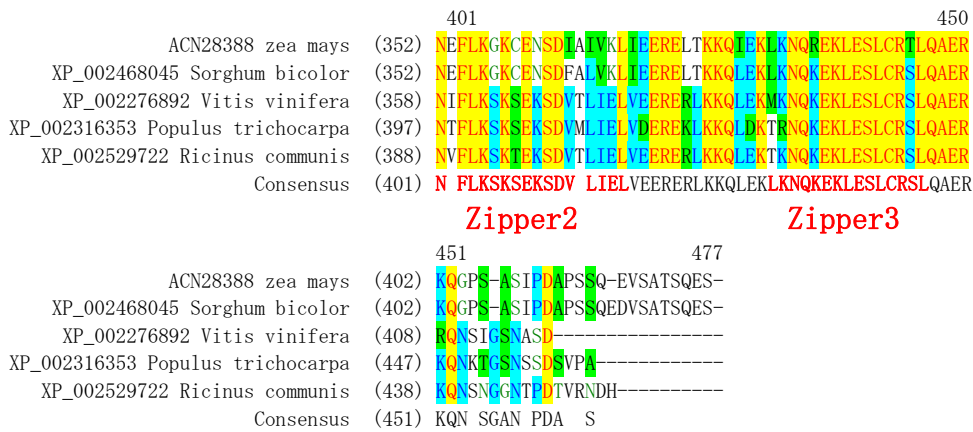

**Figure S1. Alignment of ZmTaxilin protein with other Taxilin homologous proteins.**

Yellow, green and blue background means the sequence was identical, weakly similar and conservative respectively. There is an obvious coiled-coil domain at 200-450aa. In the coiled-coil domain there are three conserved zipper domain which have a conserved leucine acid every seven amino acid.
