# Supplementary material for: Zea mays Taxilin Protein Negatively Regulates Opaque-2 Transcriptional Activity by Causing a Change in Its Sub-Cellular Distribution
Source: PubMed Central journal article supplement (PMC3427180; doi:10.1371/journal.pone.0043822), 2012-08-24
Supplement: pone.0043822.s002.pdf [file pone.0043822.s002.pdf]

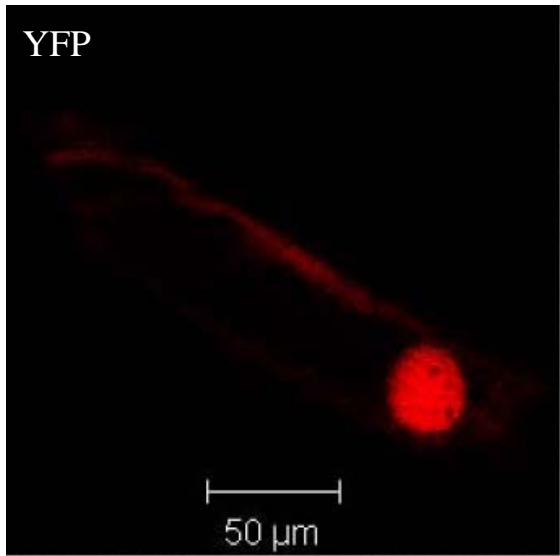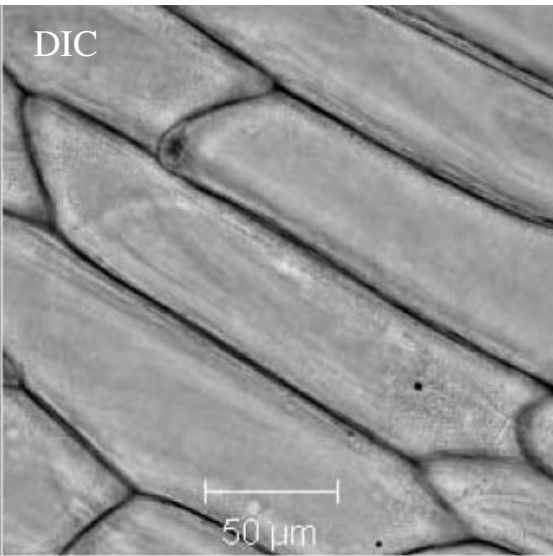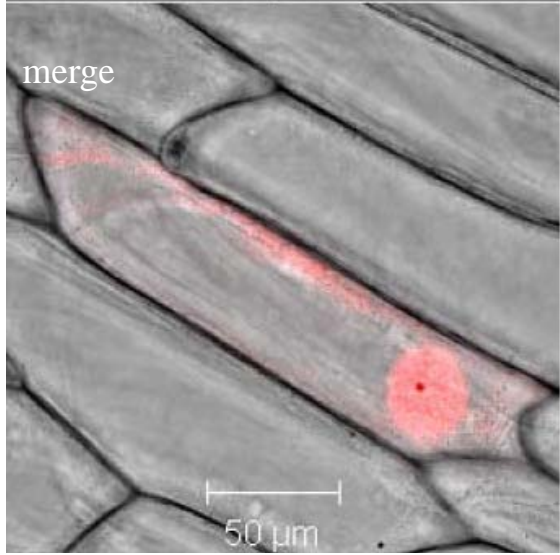

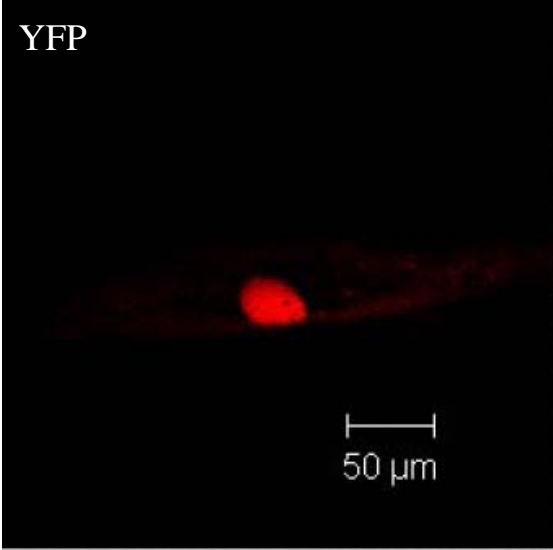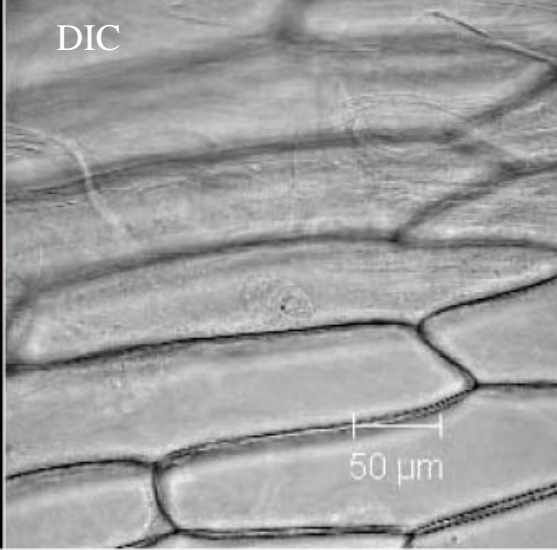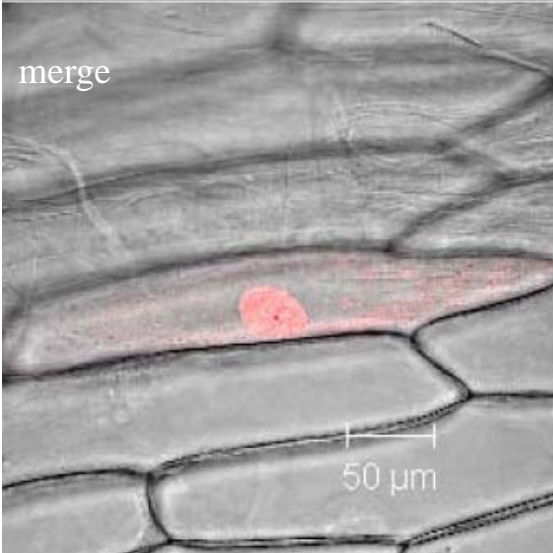

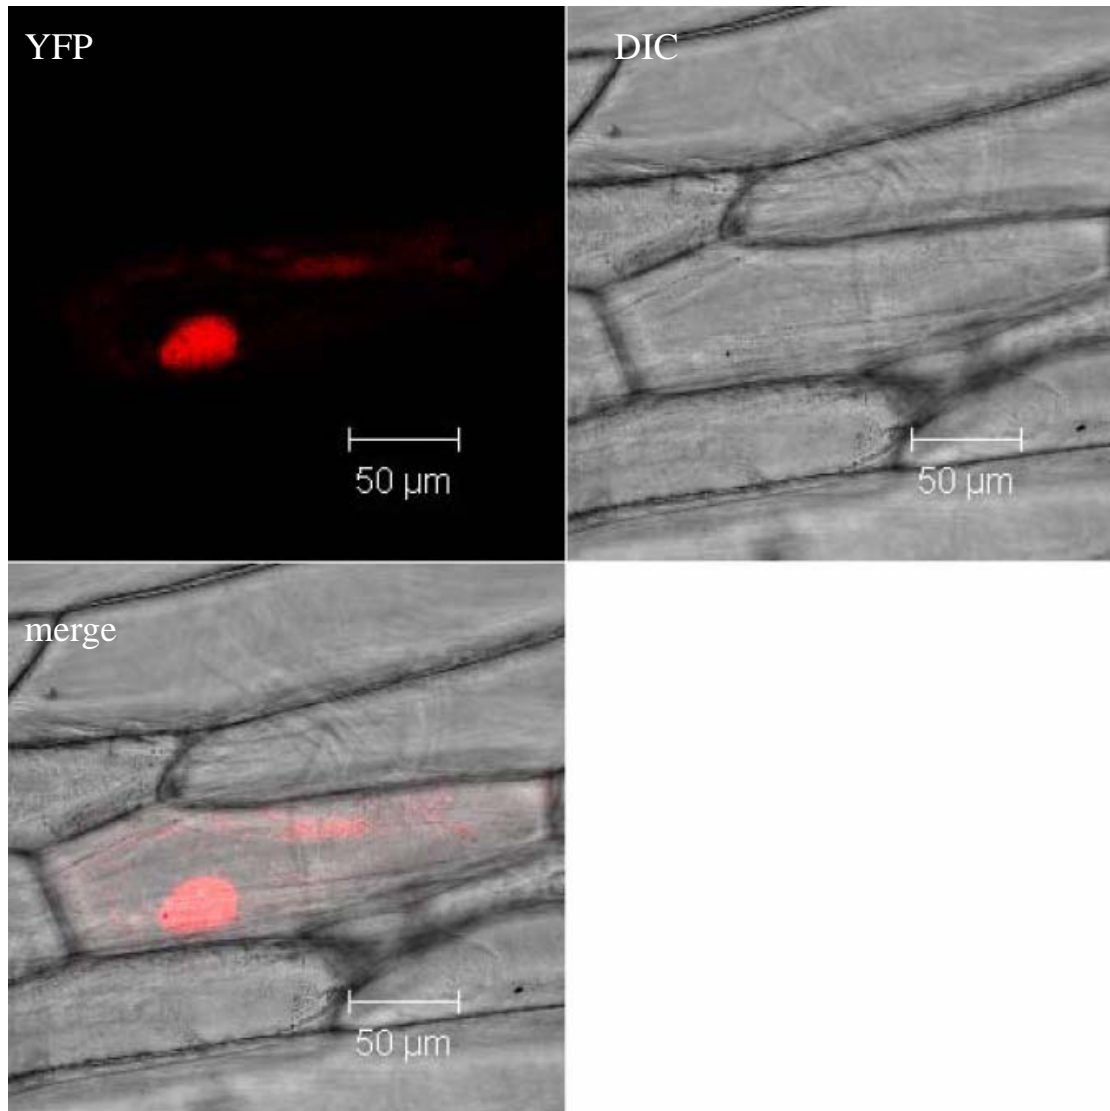

**Figure S2. Localization of YFP-O2 in onion epidermal cells.** Onion epidermal cells were bombarded with YFP-O2. Red represents YFP fluorescence. Differential interference contrast (DIC) was used in light mode.
