# Supplementary material for: Zea mays Taxilin Protein Negatively Regulates Opaque-2 Transcriptional Activity by Causing a Change in Its Sub-Cellular Distribution
Source: PubMed Central journal article supplement (PMC3427180; doi:10.1371/journal.pone.0043822), 2012-08-24
Supplement: pone.0043822.s003.pdf [file pone.0043822.s003.pdf]

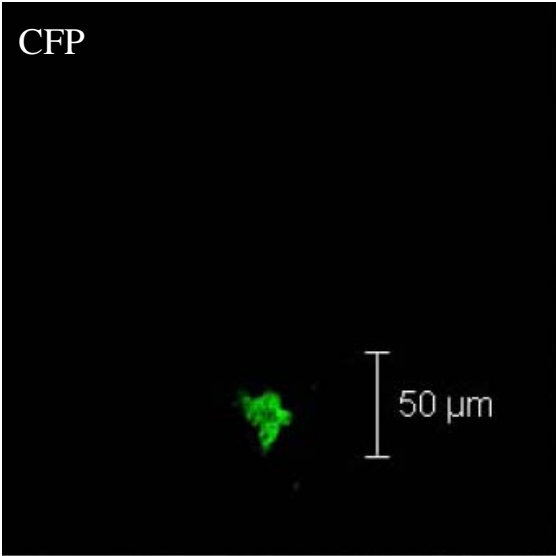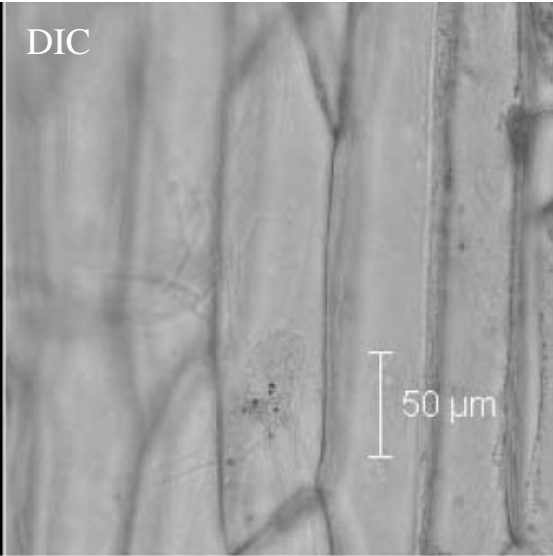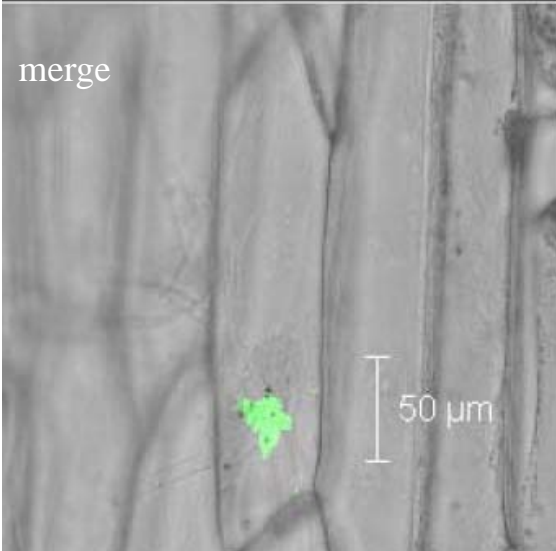

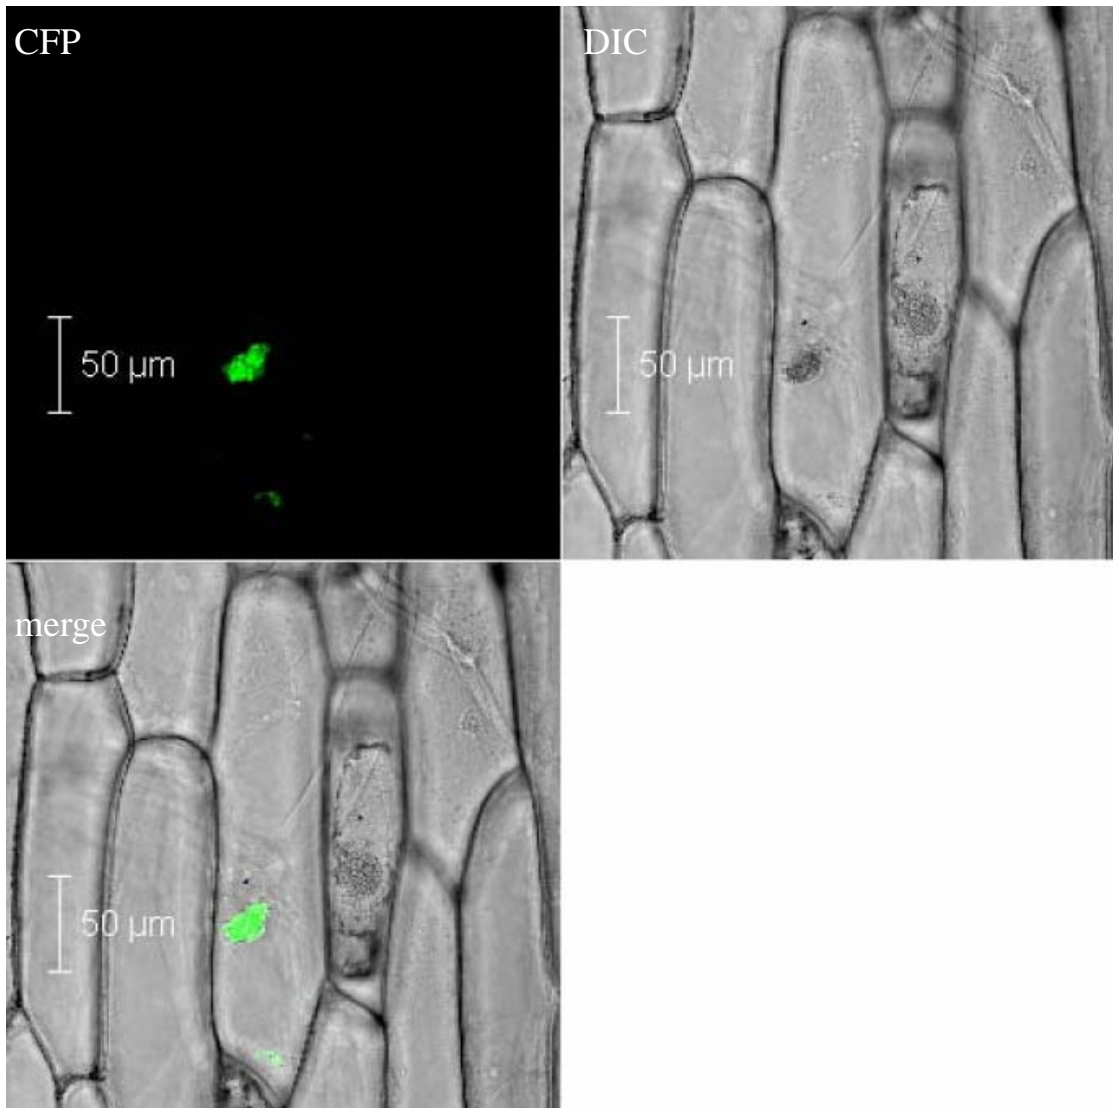

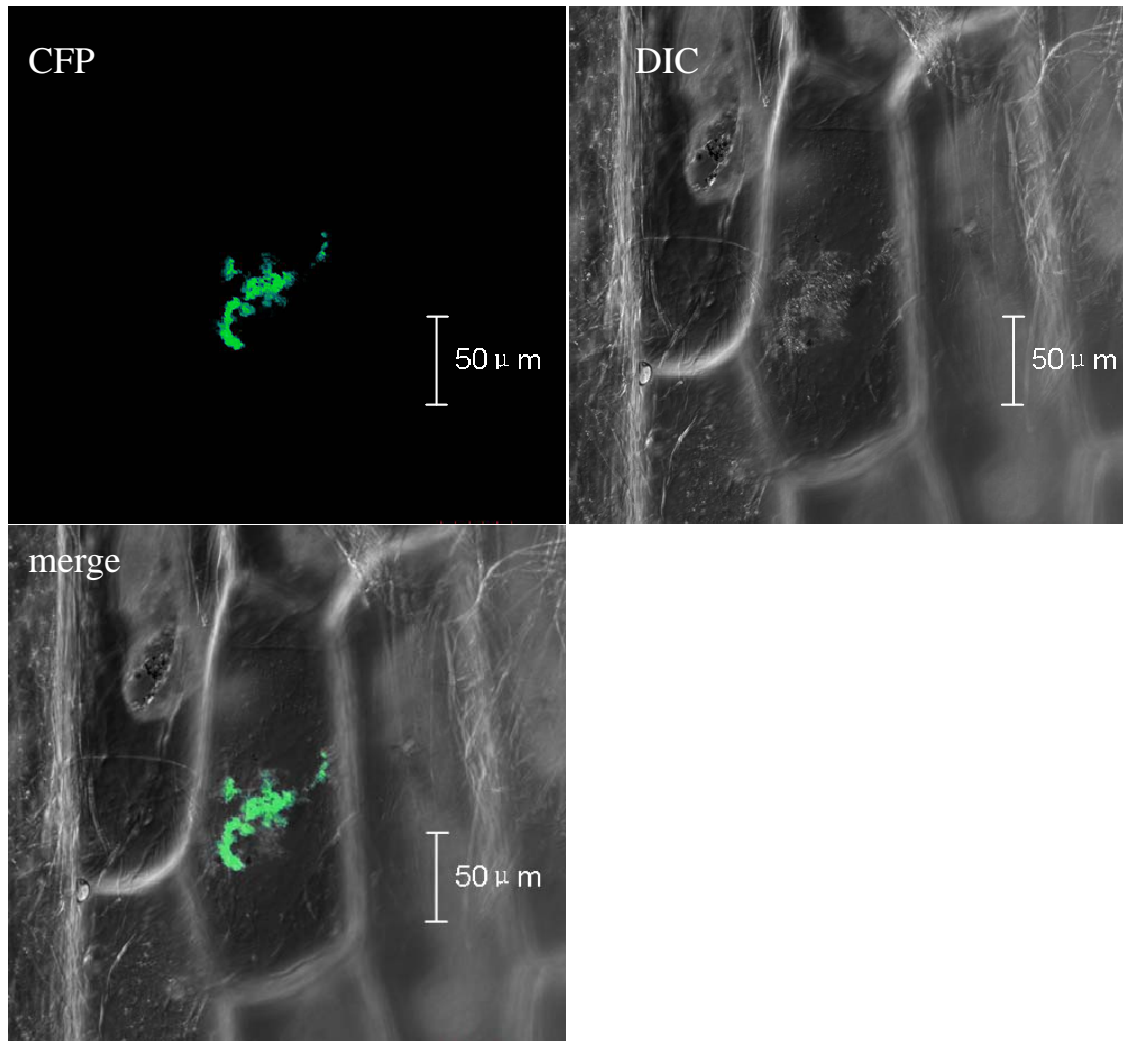

**Figure S3. Localization of CFP-Taxilin in onion epidermal cells.** Onion epidermal cells were bombarded with CFP-Taxilin. Green represents CFP fluorescence. Differential interference contrast (DIC) was used in light mode.
