# Supplementary material for: Zea mays Taxilin Protein Negatively Regulates Opaque-2 Transcriptional Activity by Causing a Change in Its Sub-Cellular Distribution
Source: PubMed Central journal article supplement (PMC3427180; doi:10.1371/journal.pone.0043822), 2012-08-24
Supplement: pone.0043822.s004.pdf [file pone.0043822.s004.pdf]

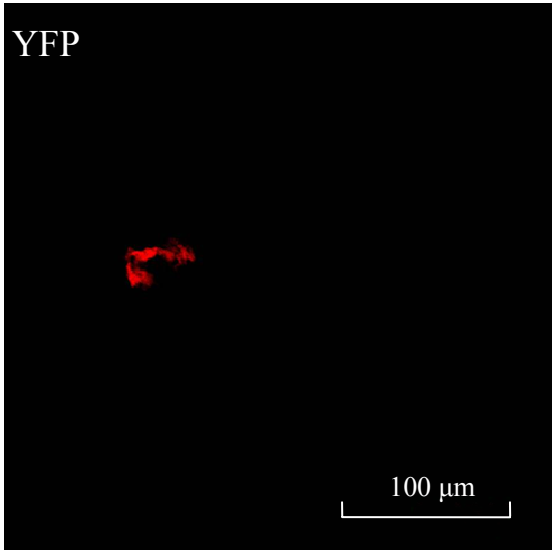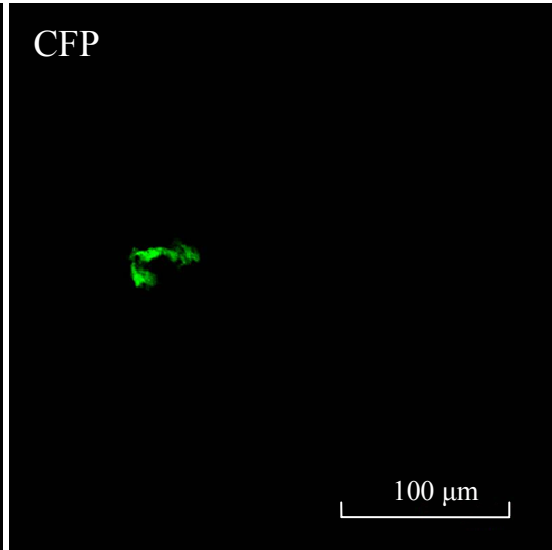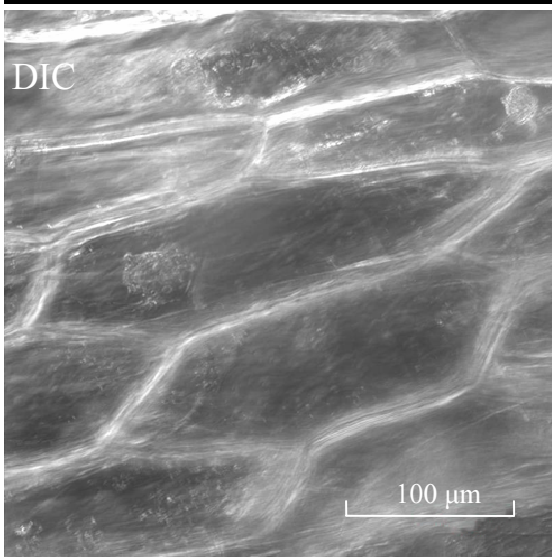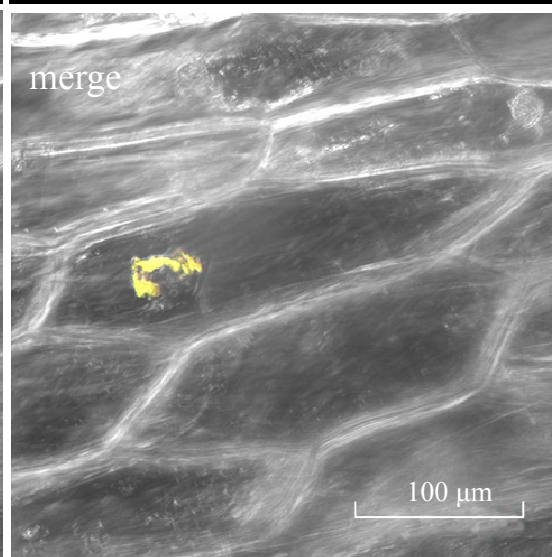

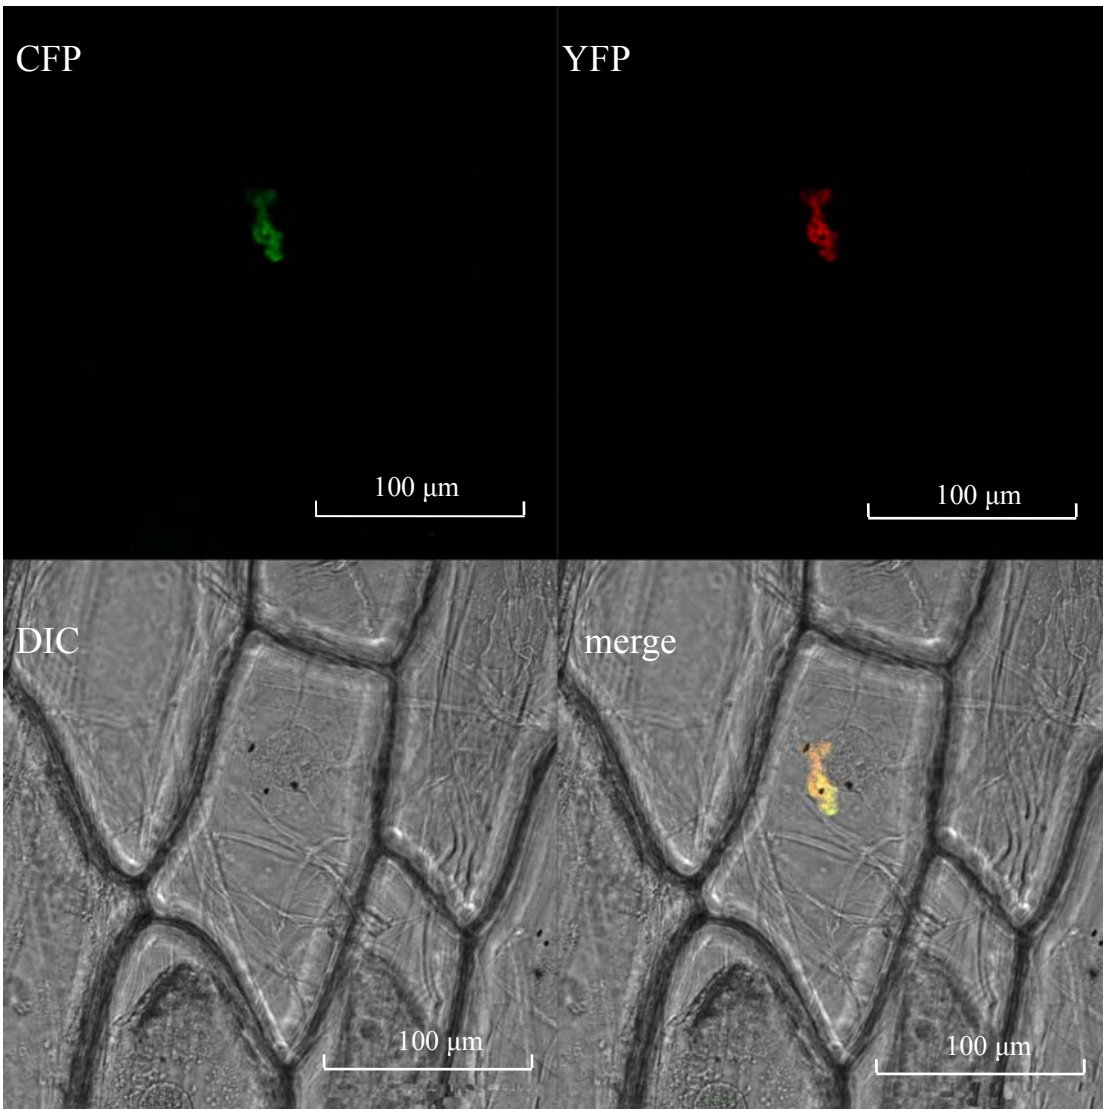

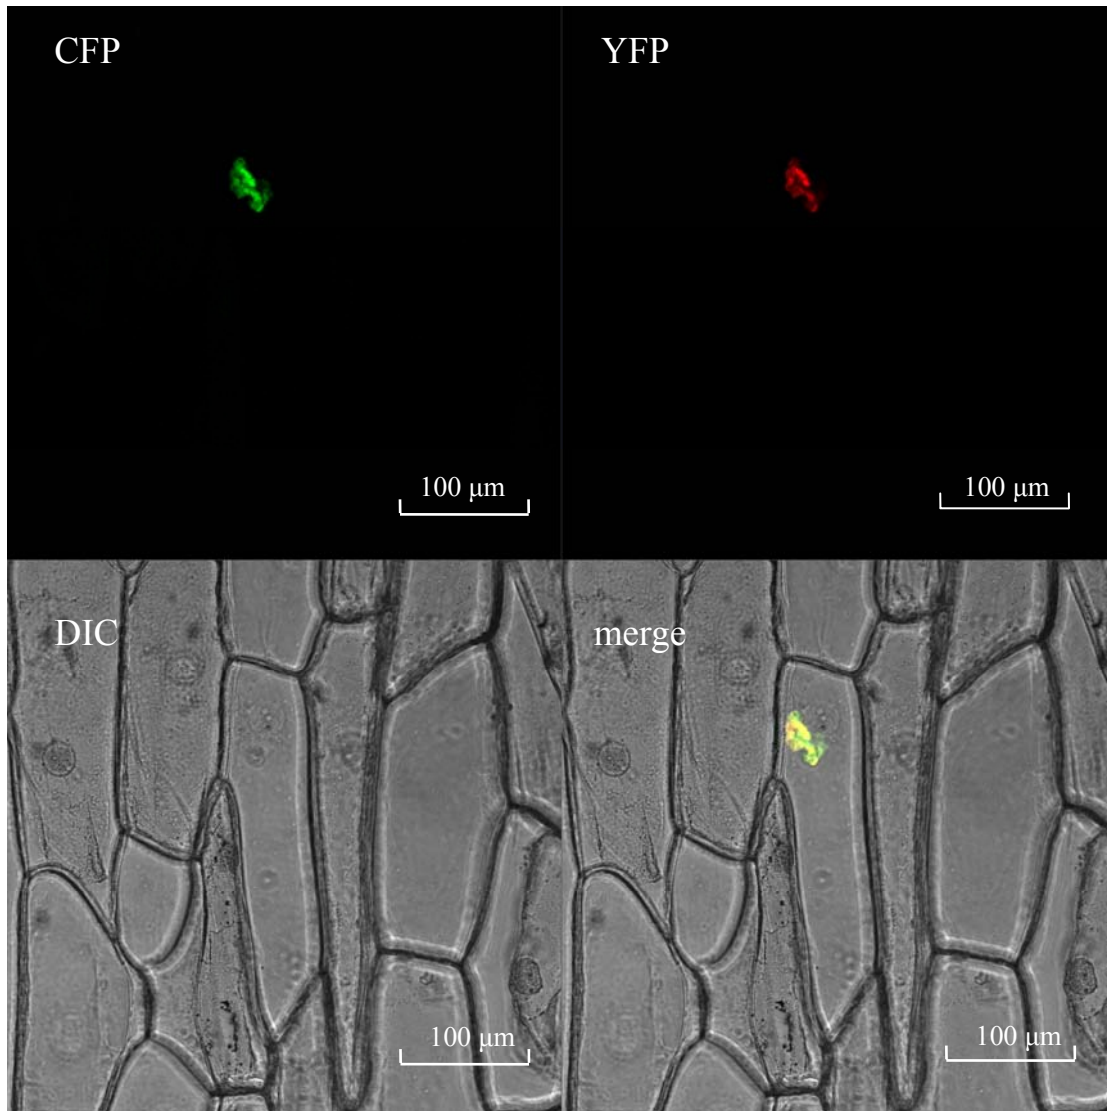

**Figure S4. Co-localization of CFP-Taxilin and YFP-O2 in onion epidermal cells.** Red represents YFP fluorescence and green represents CFP fluorescence. Differential interference contrast (DIC) was used in light mode.
